# Supplementary material for: Электрокинетические свойства гуминовых веществ
Source: Royal Society of Chemistry journal article supplement (doi:10.1039/d4ra01154f), 2009-01-01
Supplement: d4ra01154f1.pdf [file d4ra01154f1.pdf]

## Electronic Supplementary Information

# Nanostructuring Silica-iron Core-shell Particles in a One-step Aerosol Process

*Delyana Ratnasari,<sup>a</sup> Eka Lutfi Septiani,<sup>a</sup> Asep Bayu Dani Nandiyanto,<sup>b</sup> Kiet Le Anh Cao,<sup>a</sup>  
Nobuhiro Okuda,<sup>c</sup> Hiroyuki Matsumoto,<sup>c</sup> Tomoyuki Hirano,<sup>a</sup> and Takashi Ogi<sup>a †</sup>*

<sup>a</sup>Chemical Engineering Program, Department of Advanced Science and Engineering,  
Graduate School of Advanced Science and Engineering, Hiroshima University, 1-4-1  
Kagamiyama, Higashi-Hiroshima, Hiroshima 739-8527, Japan

<sup>b</sup>Program Studi Kimia, Fakultas Pendidikan Matematika dan Ilmu Pengetahuan Alam,  
Universitas Pendidikan Indonesia, Jl. Setiabudhi No 229, Bandung, 40154, West Java,  
Indonesia

<sup>c</sup>Materials Research Center, Technology & Intellectual Property HQ, TDK Corporation,  
570-2 Matsugashita, Minami-Hadori, Narita, Chiba 286-8588, Japan

†Corresponding author: Takashi Ogi, [ogit@hiroshima-u.ac.jp](mailto:ogit@hiroshima-u.ac.jp)

Tel/Fax: +81-82-424-3765

## Contents

|                                                                                                                         |      |
|-------------------------------------------------------------------------------------------------------------------------|------|
| <b>1. Recent Report of Fe@SiO<sub>2</sub> Synthesis on Last Decades</b> .....                                           | S-3  |
| <b>2. Experiment for Calculating the Number of Cores</b> .....                                                          | S-5  |
| <b>3. Effect of Increasing the Degree of Reduction with an Excessive Number of Cores on the Crystal Structure</b> ..... | S-8  |
| <b>4. Determining the Ratio of Number of SiO<sub>2</sub> Monomer per Core Particle</b> .....                            | S-9  |
| <b>5. Rietveld Refinement Result of Fe@SiO<sub>2</sub> Particle at Different Number of Cores</b>                        | S-11 |
| <b>6. Calculation of the Ratio of Mole of Supplied H<sub>2</sub> per Mole Core Particle</b> .....                       | S-12 |
| <b>7. Effect of Different Degrees of Reduction with Sufficient Number of Cores in the Crystal Structure</b> .....       | S-14 |
| <b>References</b> .....                                                                                                 | S-15 |

## 1. Recent Report of Fe@SiO<sub>2</sub> Synthesis on Last Decades

To highlight our novel approach in synthesizing Fe@SiO<sub>2</sub> particles, we incorporate a comprehensive literature review from the recent reports. The classification of this review is structured around the varying processes to successfully produce Fe@SiO<sub>2</sub> particles, categorized as either a multi-step or single-step process, as shown in **Table S1**.

**Table S1.** A recent report of Fe@SiO<sub>2</sub> synthesis in the last decades

| Number of syntheses  | Method and its condition                                                          | Raw material                                                                                           | Final product                                                                                                           | Finding and remark                                                                                                                                                                                                                                                                                                            |
|----------------------|-----------------------------------------------------------------------------------|--------------------------------------------------------------------------------------------------------|-------------------------------------------------------------------------------------------------------------------------|-------------------------------------------------------------------------------------------------------------------------------------------------------------------------------------------------------------------------------------------------------------------------------------------------------------------------------|
| Multi-step synthesis | Hydrothermal reaction and Stöber method with total synthesis of 42 h              | FeCl <sub>3</sub> ·6H <sub>2</sub> O as Fe source and TEOS as SiO <sub>2</sub> source                  | Nanocapsules of Fe@SiO <sub>2</sub> with 10-35 nm shell thickness                                                       | Fe@SiO <sub>2</sub> with multicore Fe is obtained through 4-step synthesis, i.e., β-FeOOH, β-FeOOH@SiO <sub>2</sub> , α-Fe <sub>2</sub> O <sub>3</sub> @SiO <sub>2</sub> , and Fe@SiO <sub>2</sub> . The production of Fe@ in this process involves a complex and time-consuming reaction. <sup>1</sup>                       |
| Multi-step synthesis | Hydrothermal reaction and the Stöber method. This process requires 18 hours       | Iron (II) sulfate as Fe source and TEOS as SiO <sub>2</sub> source.                                    | Fe@SiO <sub>2</sub> particles are cubic in shape, with a size of 500 nm and a shell thickness ranging from 10 to 20 nm. | Fe particles can be obtained by the hydrothermal reaction. It is found that a small amount of the residue of surfactant (ethylenediamine) helps the successful SiO <sub>2</sub> coating on the Fe particle. This process study underscores the need for surfactants to modify Fe particle's surface. <sup>2</sup>             |
| Multi-step synthesis | Co-precipitation and Stöber method. The total duration for synthesis is 24 hours. | Fe(NO <sub>3</sub> ) <sub>3</sub> ·9H <sub>2</sub> O as Fe source and TEOS as SiO <sub>2</sub> source. | Fe@SiO <sub>2</sub> with chain-like formation. The particle size is 13 nm with 4 nm shell thickness.                    | Fe@SiO <sub>2</sub> containing Fe <sub>2</sub> O <sub>3</sub> was produced. Oleic and citric acid were used as surface-capping agents to assist the coating process. This process highlights the surface modification of cores and may need additional processes to reduce Fe <sub>2</sub> O <sub>3</sub> to Fe. <sup>3</sup> |
| Multi-step synthesis | Mechanical milling and Stöber method. The complete synthesis process              | Fe Powder and TEOS as SiO <sub>2</sub> sources.                                                        | Flake-shape of Fe@SiO <sub>2</sub> with particle size ranging from 5-15 μm and 1-2                                      | This process used Fe powder to synthesize Fe flakes. The mineral spirit was then added to the powder mixture to avoid oxidation during milling. It is noteworthy Fe powder is used as                                                                                                                                         |

|                      |                                                                                        |                                                                                                                  |                                                                                                                  |                                                                                                                                                                                                                                                                               |
|----------------------|----------------------------------------------------------------------------------------|------------------------------------------------------------------------------------------------------------------|------------------------------------------------------------------------------------------------------------------|-------------------------------------------------------------------------------------------------------------------------------------------------------------------------------------------------------------------------------------------------------------------------------|
|                      | requires 6 hours.                                                                      |                                                                                                                  | $\mu\text{m}$ shell thickness                                                                                    | raw material, which is less abundance. <sup>4</sup>                                                                                                                                                                                                                           |
| Multi-step synthesis | Hydrothermal reaction and Stöber method and required 18 hours process.                 | $\text{FeCl}_3 \cdot 6\text{H}_2\text{O}$ as Fe source and TEOS as $\text{SiO}_2$ source.                        | $\text{Fe}@\text{SiO}_2$ with asymmetric shape. The measured particle size is 275 nm with 13 nm shell thickness. | $\text{Fe}@\text{SiO}_2$ can be synthesized without additional surfactant. However, the particle shape was irregular. This process cannot be used for obtaining spherical particle. <sup>5</sup>                                                                              |
| One-step synthesis   | Aerosol spray pyrolysis.                                                               | $\text{Fe}(\text{NO}_3)_3 \cdot 9\text{H}_2\text{O}$ and $\text{FeCl}_3 \cdot 6\text{H}_2\text{O}$ as Fe source. | FeO with dense structure and submicron size of the particle.                                                     | FeC, Fe, and FeO are formed solely in spray pyrolysis. A post-treatment using 100% $\text{H}_2$ gas did not effectively produce Fe without FeO. This finding suggested that a higher temperature and mass transfer of the solid and reduction gas are necessary. <sup>6</sup> |
| One-step synthesis   | The hydrogen reduction-assisted ultrasonic spray pyrolysis with 2 hours operating time | $\text{Fe}(\text{NO}_3)_3 \cdot 9\text{H}_2\text{O}$ as Fe source.                                               | Si-doped $\text{Fe}_3\text{O}_4$ , Si-doped-FeO and Fe.                                                          | The composite particle of Fe, FeO, $\text{Fe}_3\text{O}_4$ , and $\text{Fe}_2\text{SiO}_4$ is obtained. An additional process is needed to reduce the FeO state to Fe. <sup>7</sup>                                                                                           |

---

## 2. Experiment for Calculating the Number of Cores

### 2.1 Experimental Setup for the Calculation of the Number of Cores

The number of cores is the most important factor in the synthesis of Fe@SiO<sub>2</sub> particles. Therefore, to understand the effect of the number of cores, we conducted a simple experiment as shown in **Fig. S1**. In this experiment, we attempted to collect the atomized droplets for 30 minutes. A precursor solution containing 0.1 mol/L Fe(NO<sub>3</sub>)<sub>3</sub>·9H<sub>2</sub>O, ethanol 30% (v/v), and ultra-pure water was used as the solvent. First, the precursor was altered by an ultrasonic nebulizer into droplets, which were carried by 5% H<sub>2</sub>/Ar gas as a carrier gas flow rate ( $Q_c$ ) of 5 L/min. In addition, atomized droplets were condensed using a condenser. The condensed droplets were collected in a flask. Their volume was assumed to be an atomized precursors.

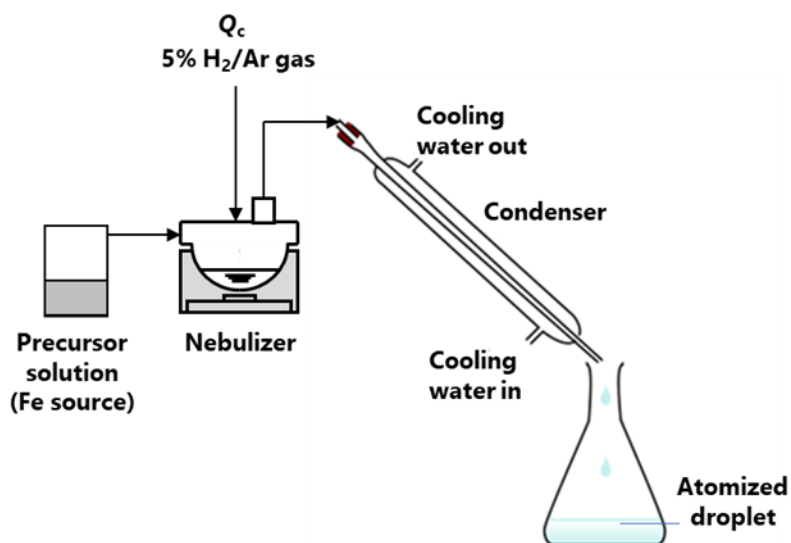

**Fig. S1** Experimental setup for calculation of the number of cores.

## 2.2 Calculating the Experimental Number of Cores per cm<sup>3</sup> Carrier Gas

According to the manufacturer's guidelines, the duty cycle of an ultrasonic nebulizer can be controlled by changing the nebulization volume. The ultrasonic nebulizer can change the nebulization volume from 1 to 10, which represents a linear duty cycle from 30% to 100%. The duty cycle represents the ratio of active nebulization time to total treatment time, which is related to the number of cores produced by the nebulizer. Therefore, the number of cores in different levels of nebulization volume can be calculated by predicting the atomization rate at the maximum duty cycle using the experimental setup in **Fig. S1**. The atomization rate at the maximum duty cycle (i.e., nebulization volume of 10) was 0.00972 mL/s. When the nebulization volumes were 2, 3, 5, and 7, the atomization rate was calculated by multiplying the duty cycle at each level by the atomization rate at the maximum duty cycle. The number of cores per cm<sup>3</sup> carrier gas ( $C_{n,w}$ ) was then calculated using the equation (1):<sup>8</sup>

$$C_{n,w} = \frac{Q_w}{V_d Q_g} \quad (1)$$

where  $Q_w$  is the precursors rate,  $V_d$  is the volume of droplets, and  $Q_g$  is the volume of the carrier gas. The droplet is assumed to be spherical with a droplet diameter ( $d_d$ ) of 4.6  $\mu\text{m}$ <sup>9</sup> according to the specifications of the ultrasonic nebulizer. Therefore, the  $V_d$  is the volume of the spherical droplet ( $V_d = \frac{\pi}{6} d_d^3$ ).  $Q_w$  is assumed to be the atomization rate of precursors, which was calculated at different levels of nebulization volume.  $Q_g$  was 8 L/min according to the experimental conditions. The results of these calculations are summarized in **Table S2**.

**Table S2.** The number of cores in different nebulizing levels.

| <b>Level of<br/>Nebulizing<br/>volume level<br/>[-]</b> | <b>Duty<br/>cycle*<br/>[%]</b> | <b>Atomization<br/>rate**<br/>[mL/s]</b> | <b>Number of cores<br/>[cores/cm<sup>3</sup> carrier gas]</b> |
|---------------------------------------------------------|--------------------------------|------------------------------------------|---------------------------------------------------------------|
| 1                                                       | 30                             | 0.00292                                  | $0.43 \times 10^6$                                            |
| 2                                                       | 38                             | 0.00369                                  | $0.54 \times 10^6$                                            |
| 3                                                       | 45                             | 0.00438                                  | $0.64 \times 10^6$                                            |
| 4                                                       | 53                             | 0.00515                                  | $0.76 \times 10^6$                                            |
| 6                                                       | 69                             | 0.00671                                  | $0.99 \times 10^6$                                            |
| 7                                                       | 77                             | 0.00749***                               | $1.10 \times 10^6$                                            |

\* Duty cycle is determined by the linear equation,  $0.0778x + 0.2222$

\*\* The atomization rate is calculated by multiplying the duty cycle by the maximum rate of atomization

\*\*\* The maximum atomization rate is determined from the experiment.

### 3. Effect of Increasing the Degree of Reduction with an Excessive Number of Cores on the Crystal Structure

Changing the ethanol concentration increased the degree of reduction during synthesis. In the case of an excessive number of cores available ( $1.10 \times 10^6$  cores/cm<sup>3</sup> carrier gas), the  $\alpha$ -Fe peak significantly improved, and the FeO peak decreased when the ethanol concentration increased from 25% to 30% (v/v), as shown in Fig. S2. This improvement is attributed to the extent of the reduction in FeO conversion to  $\alpha$ -Fe.

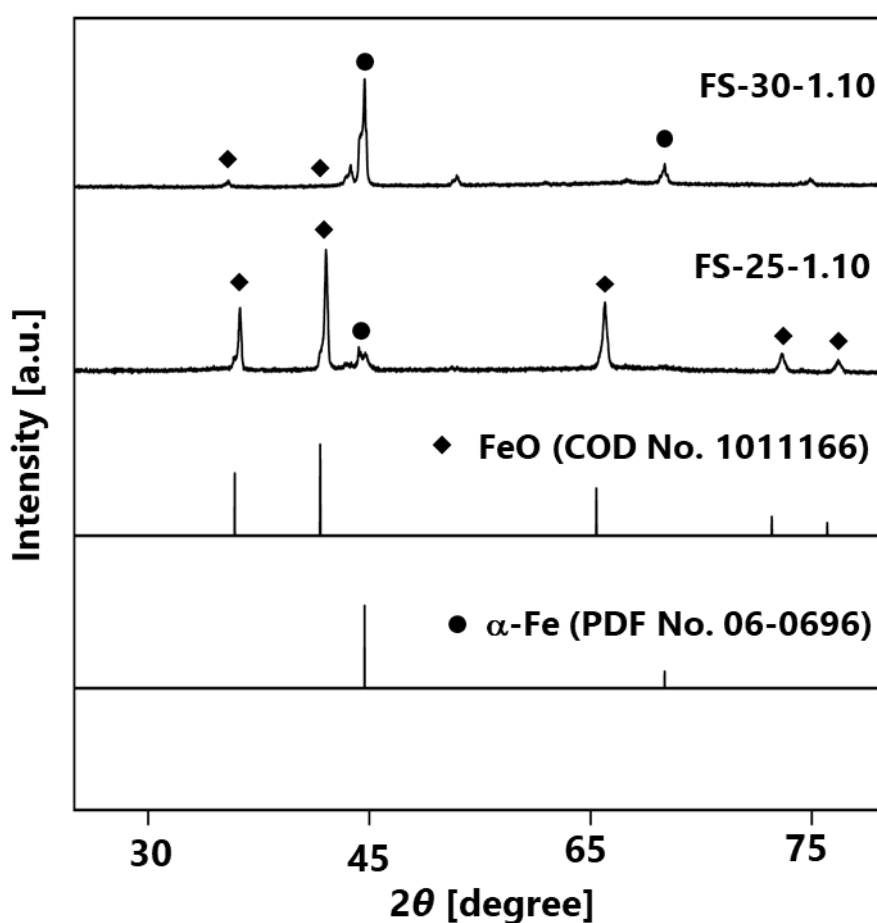

**Fig S2.** XRD pattern of Fe@SiO<sub>2</sub> particles with an excessive number of cores at different reduction degrees.



#### 4. Determining the Ratio of Number of SiO<sub>2</sub> Monomer per Core Particle

The ratio of number of SiO<sub>2</sub> monomer per core particle was calculated by dividing the number of SiO<sub>2</sub> monomer by the number of core particle. The value of the number of core particles was the same as that of number of cores, as shown in **Section 2**, assuming that all droplets were converted to particles. The number of SiO<sub>2</sub> monomers is defined as the number of supplied SiO<sub>2</sub> in this system. The Antoine equation approximation is used for calculating the supplied SiO<sub>2</sub> from hexamethyldisiloxane (HMDSO). Firstly, the vapor pressure of HMDSO was calculated using the Antoine equation (Equation (2)).

$$\log_{10} P_{v(HMDSO)} = A - \frac{B}{T_{HMDSO} + C} \quad (2)$$

Where  $P_v$  is the vapor pressure of HMDSO in mmHg;  $T_{HMDSO}$  is the temperature of HMDSO in the bubbler; and A, B, and C are constant properties of HMDSO (CAS No 107-46-0). The partial pressure of HMDSO ( $x_p$ ) can be calculated based on the vapor pressure of HMDSO. Moreover, the HMDSO volumetric flow rate,  $Q_{v(HMDSO)}$ , could be determined based on the flow rate HMDSO vapor ( $Q_s = 10$  mL/min) using the equations (3) and (4):

$$x_p = \frac{P_{v(HMDSO)}}{P_0} \quad (3)$$

$$x_p = \frac{Q_{v(HMDSO)}}{Q_{v(HMDSO)} + Q_s} \quad (4)$$

Using the HMDSO volumetric flow rate, the number of moles of HMDSO could be calculated using the ideal gas equation ( $PV = nRT$ ). The number of moles of silica supplied here was twice that of the HMDSO. The mass of the supplied SiO<sub>2</sub> ( $m_{SiO_2}$ ) was calculated by multiplying the number of moles by the molecular weight, assuming that all HMDSO were converted to SiO<sub>2</sub>. The volumetric rate of the supplied SiO<sub>2</sub> ( $V_s$ ) was determined by dividing  $m_{SiO_2}$  by the SiO<sub>2</sub> density. The volumetric rate of supplied SiO<sub>2</sub> was  $5.56 \times 10^{-6}$  cm<sup>3</sup>/s. The

number of the supplied silica is determined by dividing the  $V_s$  and volume of silica monomer ( $V_m$ ). Here,  $V_m$  was assumed to be the same as the volume of the  $\text{SiO}_2$  molecule ( $4.53 \times 10^{-23} \text{ cm}^3$ ).<sup>10</sup>

## 5. Rietveld Refinement Result of Fe@SiO<sub>2</sub> Particle at Different Number of Core

Table S3. Rietveld analysis result of Fe@SiO<sub>2</sub> particles with different numbers of cores.

| Name       | R factor               |                         | GOF  | Weight percentage [wt%] |     |
|------------|------------------------|-------------------------|------|-------------------------|-----|
|            | <i>R</i> <sub>wp</sub> | <i>R</i> <sub>exp</sub> |      | $\alpha$ -Fe            | FeO |
| FS-25-1.10 | 9.71                   | 5.58                    | 1.71 | 13                      | 87  |
| FS-25-0.64 | 13.21                  | 5.36                    | 1.36 | 56                      | 32  |
| FS-30-0.43 | 14.63                  | 5.13                    | 2.35 | 86                      | 14  |
| FS-30-0.54 | 13.65                  | 5.40                    | 2.53 | 95                      | 5   |
| FS-30-0.64 | 10.38                  | 16.58                   | 1.87 | 100                     | 0   |
| FS-30-0.76 | 12.31                  | 5.40                    | 2.28 | 99                      | 1   |
| FS-30-0.99 | 9.56                   | 5.42                    | 1.76 | 97                      | 3   |
| FS-30-1.10 | 12.71                  | 5.39                    | 2.36 | 96                      | 4   |

## 6. Calculation of the Ratio of Mole of Supplied H<sub>2</sub> per Mole Core Particle

The supplied H<sub>2</sub> encompasses the total H<sub>2</sub> utilized in the reaction, including the H<sub>2</sub> derived from the carrier and additional gases as well as the H<sub>2</sub> generated through ethanol conversion. To determine supplied H<sub>2</sub> from the carrier gas ( $Q_c$ ) and additional gas ( $Q_a$ ), we employed an H<sub>2</sub> gas mixture with a composition of 5% H<sub>2</sub>/Ar, which was multiplied by the total volumetric gas flow rate. The H<sub>2</sub> consumed was converted into moles by multiplying it by the gas density. The density of the 5% H<sub>2</sub>/Ar gas was 1.696 kg/m<sup>3</sup> (Data sheet NL-PIB-0284/04). The supplied H<sub>2</sub> was calculated to be 13.3 moles/h, whereas that of the additional gas was 8 moles/h. Furthermore, the H<sub>2</sub> generated from ethanol conversion was determined by stoichiometry. The ethanol conversion equation<sup>11</sup> is shown in Equation (5):

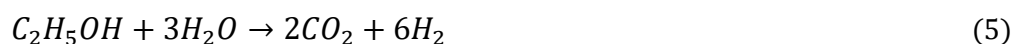

Based on the use of 30% (v/v) ethanol in this study, the generation of H<sub>2</sub> is 2.1 moles/h. Furthermore, we determined the ratio of moles of supplied H<sub>2</sub> per moles of core particle. The latter was calculated based on the stoichiometry of the mole of precursors according to Equations (6)–(9):

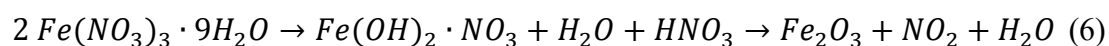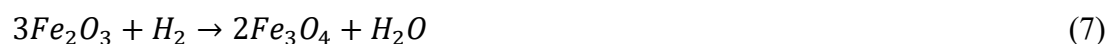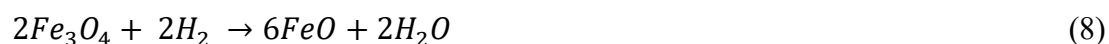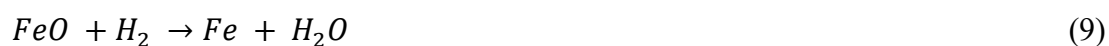

The number of mole of precursors was determined by multiplying the concentration of precursors by their volume and then dividing by the volume of the particles. Therefore, the number of moles of the core particle was calculated by multiplying the stoichiometrically calculated mole of Fe by the number of core particles. The resulting ratio of the molar concentration of supplied H<sub>2</sub> per mole of core particle is shown in **Table S4**.

**Table S4.** The ratio of the mole of supplied H<sub>2</sub> per mole core particle using 30 vol% (v/v) ethanol

| <b>Nebulization<br/>volume level<br/>[-]</b> | <b>Number of cores<br/>[cores/cm<sup>3</sup> carrier gas]</b> | <b>Ratio of mole concentration of supplied<br/>H<sub>2</sub> per mole core particle*<br/>[moles of H<sub>2</sub>/moles of core particle]</b> |
|----------------------------------------------|---------------------------------------------------------------|----------------------------------------------------------------------------------------------------------------------------------------------|
| 1                                            | $0.43 \times 10^6$                                            | 200                                                                                                                                          |
| 2                                            | $0.54 \times 10^6$                                            | 158                                                                                                                                          |
| 3                                            | $0.64 \times 10^6$                                            | 133                                                                                                                                          |
| 4                                            | $0.76 \times 10^6$                                            | 113                                                                                                                                          |
| 6                                            | $0.99 \times 10^6$                                            | 87                                                                                                                                           |
| 7                                            | $1.10 \times 10^6$                                            | 78                                                                                                                                           |

\* Ratio of mole concentration of supplied H<sub>2</sub> per mole core particle is calculated by dividing mole of total H<sub>2</sub> supplied and mole of core particle\*\*.

\*\* Mole of core is determined by multiplying the mole of Fe and the number of core particle.

## 7. Effect of Different Degrees of Reduction with Sufficient Number of Cores in the Crystal Structure

To confirm that increasing the concentration of ethanol (as the reduction agent) from 25% to 30% (v/v) with a sufficient number of cores can completely convert FeO to  $\alpha$ -Fe, XRD analysis was conducted. As shown in **Fig. S3**, the FeO peak was detected in the **FS-25-0.64** sample when the ethanol concentration was 25% (v/v). Meanwhile, by increasing ethanol concentration to 30% (v/v), the  $\alpha$ -Fe peak was obtained in the absence of FeO.

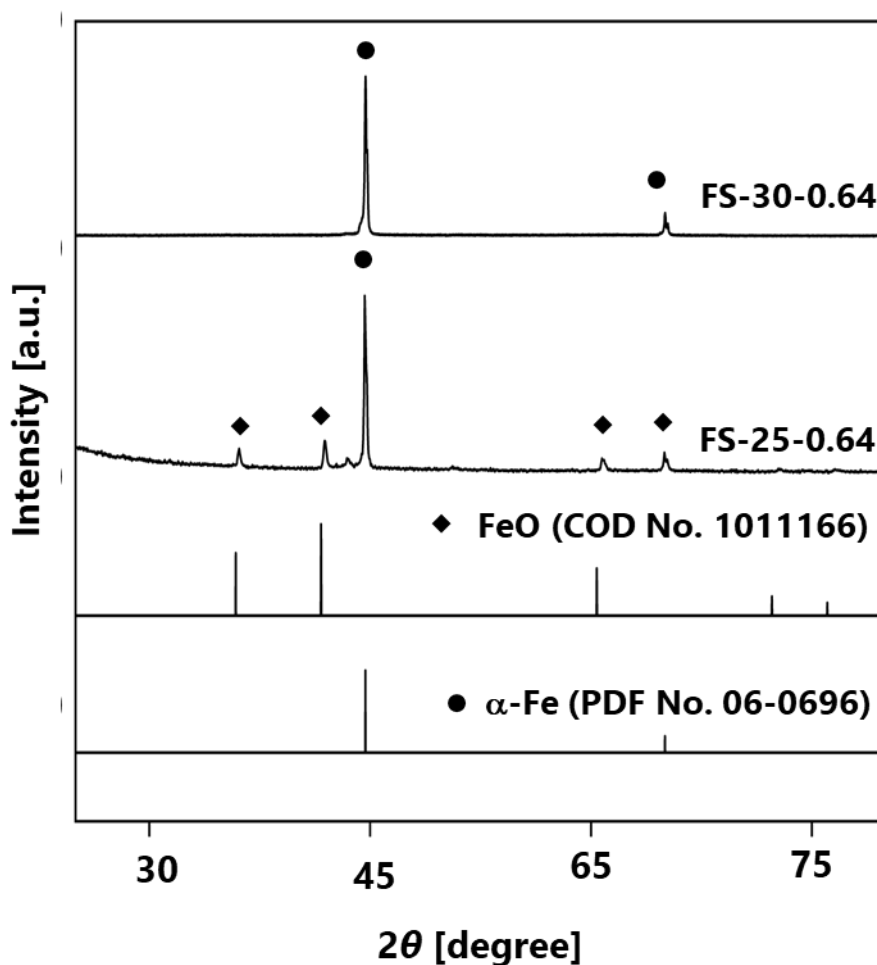

**Fig. S3.** The X-ray diffraction pattern of Fe@SiO<sub>2</sub> particles with a sufficient number of cores at different degrees of reduction.

## References

- 1 W. Zeng, Q. Yang, B. Shao, D. Guo, C. Li, Y. Ma, X. Yin, S. Zhao and K. Li, *Micro Nano Lett*, 2019, **14**, 976–979.
- 2 X. Ni, Z. Zheng, X. Hu and X. Xiao, *J Colloid Interface Sci*, 2010, **341**, 18–22.
- 3 A. Zeleňáková, V. Zeleňák, I. Mat’Ko, M. Strečková, P. Hrubovčák and J. Kováč, *J Appl Phys*, 2014, **116**, 033907.
- 4 Y. Janu, V. S. Chauhan, D. Chaudhary, L. Saini and M. K. Patra, *IEEE Trans Magn*, 2019, **55**, 1–7.
- 5 J. Cheng, X. Ni, H. Zheng, B. Li, X. Zhang and D. Zhang, *Mater Res Bull*, 2006, **41**, 1424–1429.
- 6 G. Kastrinaki, S. Lorentzou, G. Karagiannakis, M. Rattenbury, J. Woodhead and A. G. Konstandopoulos, *J Aerosol Sci*, 2018, **115**, 96–107.
- 7 S. Stopic, A. H. Hounsinou, K. A. Stéphane, T. Volkov Husovic, E. Emil-Kaya and B. Friedrich, *Metals*, 2023, **13**, 1686.
- 8 W. N. Wang, A. Purwanto, I. W. Lenggoro, K. Okuyama, H. Chang and H. D. Jang, *Ind Eng Chem Res*, 2008, **47**, 1650–1659.
- 9 Ltd. Omron Healthcare Co., 2015, 23.
- 10 S. Tsantilis and S. E. Pratsinis, *Langmuir*, 2004, **20**, 5933–5939.
- 11 E. L. Septiani, J. Kikkawa, K. L. A. Cao, T. Hirano, N. Okuda, H. Matsumoto, Y. Enokido and T. Ogi, *Advanced Powder Technology*, 2021, **32**, 4263–4272.
